# Supplementary material for: A simple strategy for efficient preparation of networks based on poly(2-isopropenyl-2-oxazoline), poly(ethylene oxide), and selected biologically active compounds: Novel hydrogels with antibacterial properties
Source: Royal Society of Chemistry journal article supplement (doi:10.1039/d1sm01066b), 2021-01-01
Supplement: d1sm01066b1.pdf [file d1sm01066b1.pdf]

Supporting information for:

**A Simple Strategy for Efficient Preparation of Networks Based on Poly(2-isopropenyl-2-oxazoline), Poly(ethylene oxide), and Selected Biologically Active Compounds. Novel Hydrogels with Antibacterial Properties**

B. Kopka<sup>1</sup>, B. Kost<sup>1\*</sup>, K. Rajkowska<sup>2</sup>, A. Pawlak<sup>1</sup>, A. Kunicka-Styczyńska<sup>2</sup>, T. Biela<sup>1</sup>, M. Basko<sup>1\*</sup>

<sup>1</sup>Centre of Molecular and Macromolecular Studies, Polish Academy of Sciences,  
Sienkiewicza 112, 90-363 Lodz, Poland

<sup>2</sup>Institute of Fermentation Technology and Microbiology, Faculty of Biotechnology and Food  
Sciences, Lodz University of Technology, Wólczańska 171/173, 90-924 Lodz, Poland

\*Email: [baskomeg@cbmm.lodz.pl](mailto:baskomeg@cbmm.lodz.pl), [kost@cbmm.lodz.pl](mailto:kost@cbmm.lodz.pl),

**Table of contents:**

|                                                                                        |   |
|----------------------------------------------------------------------------------------|---|
| Figure 1S. GPC, <sup>1</sup> H NMR and <sup>13</sup> C NMR spectrum of PiPOx.....      | 2 |
| Figure 2S. <sup>1</sup> H NMR of di-carboxyl poly(ethylene oxide) (HOOC-PEO-COOH)..... | 3 |
| Figure 3S. SEM micrographs of the dried networks surface.....                          | 4 |
| Figure 4S. Calibration curve.....                                                      | 5 |
| Table 1S. Content of gel fraction.....                                                 | 6 |

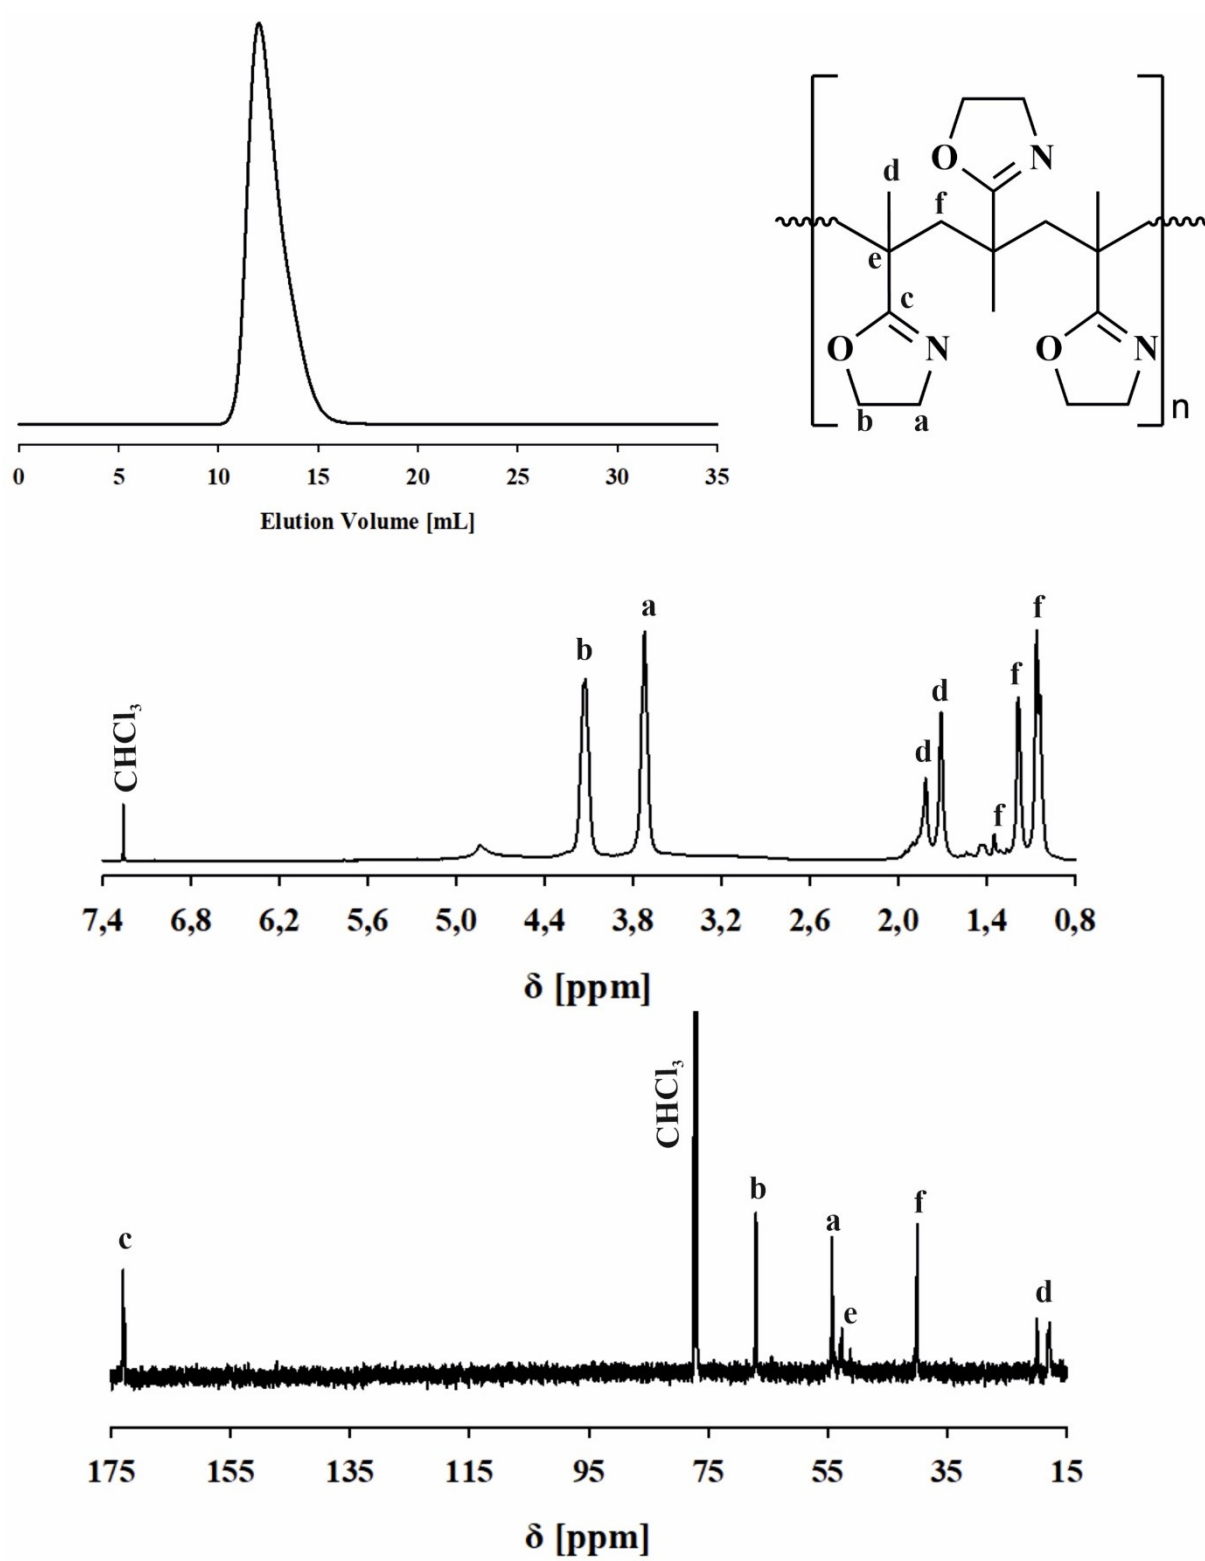

Figure 1S. GPC,  $^1\text{H}$  NMR and  $^{13}\text{C}$  NMR spectrum of PiPOx

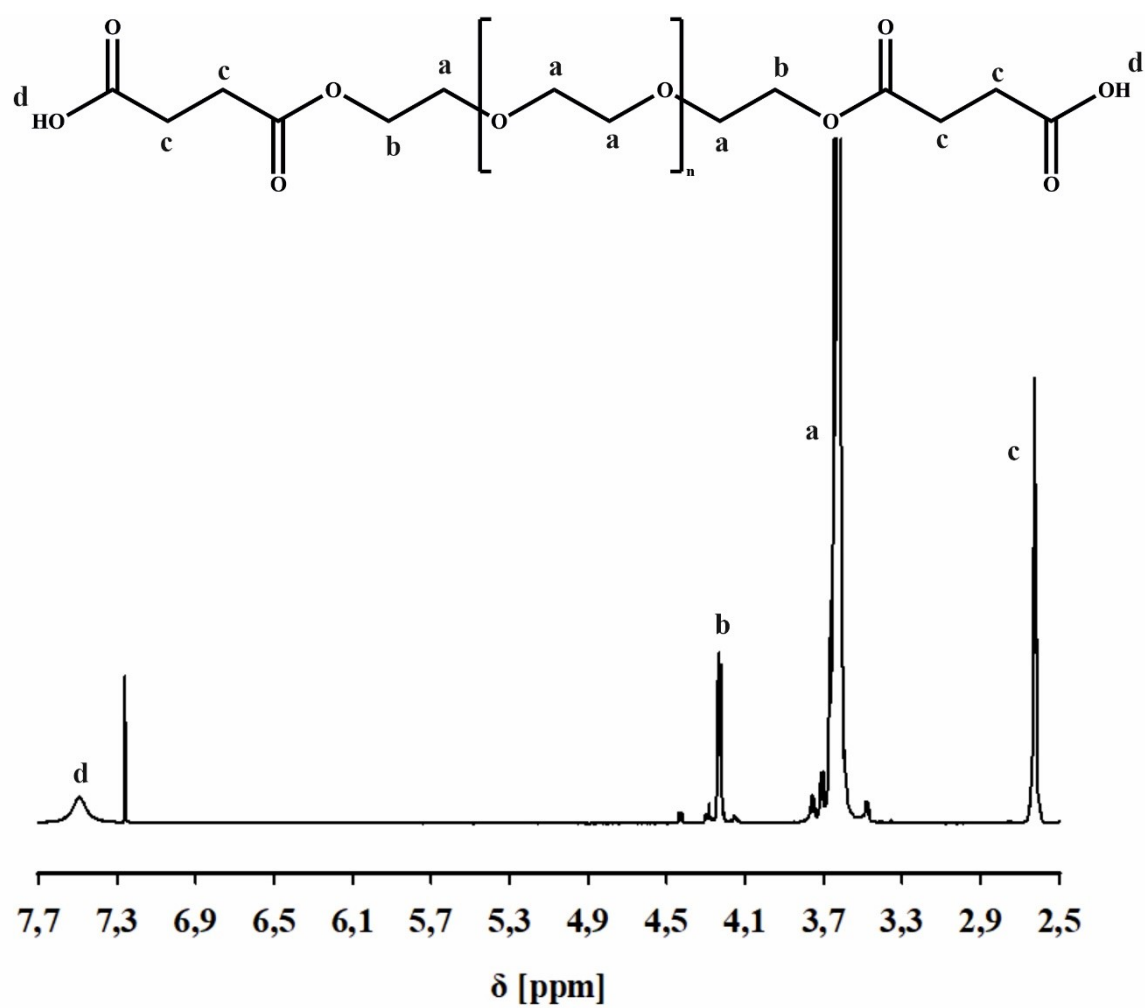

Figure 2S.  $^1\text{H}$  NMR of di-carboxyl poly(ethylene oxide) (HOOC-PEO-COOH)

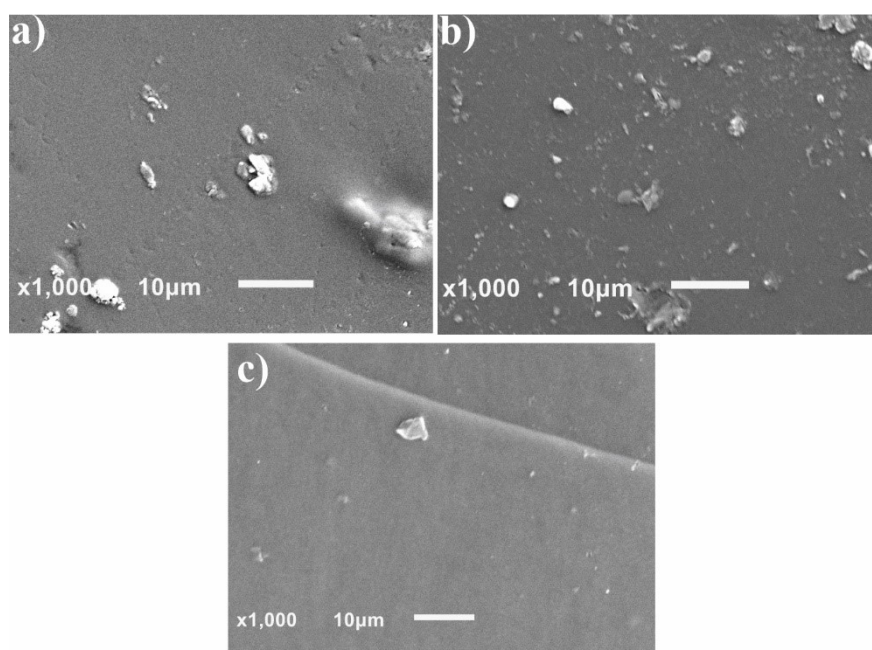

Figure 3S. SEM micrographs of the dried networks surface.

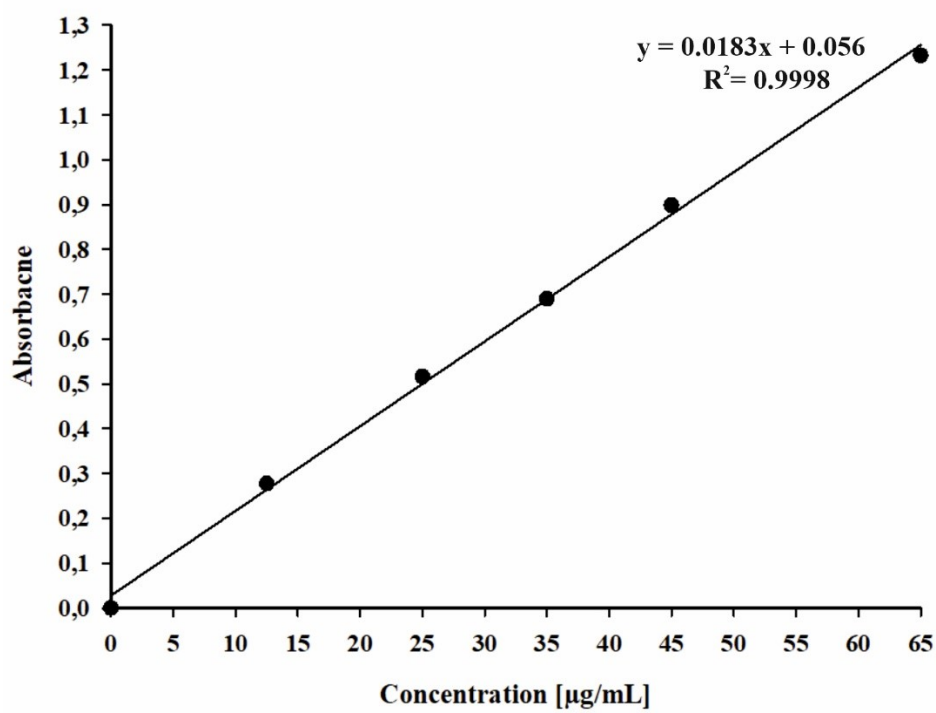

Figure 4S. Calibration curve

Table 1S. Content of gel fraction determined after extraction with dichloromethane and next, with ethanol.

| Sample       | m <sub>PiPOx</sub><br>[mg] | m <sub>PEO</sub><br>[mg] | m <sub>active compounds</sub><br>[mg] | m <sub>dried network</sub><br>[mg] | gel content<br>[wt. %] |
|--------------|----------------------------|--------------------------|---------------------------------------|------------------------------------|------------------------|
| PiPOx-PEO    | 53                         | 18                       | -----                                 | 69                                 | 97                     |
| PiPOx-PEO-CA | 52                         | 18                       | 7                                     | 74                                 | 96                     |
| PiPOx-PEO-BA | 53                         | 18                       | 6                                     | 73                                 | 94                     |
| PiPOx-PEO/Eu | 51.5                       | 18                       | 7.5                                   | 69.5                               | 90                     |
